# Supplementary material
Source: PubMed Central journal article supplement (PMC5900995)
Supplement: BPH-175-1439-s001.pdf [file BPH-175-1439-s001.pdf]

Calycosin

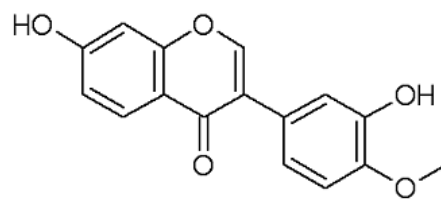

Formononetin

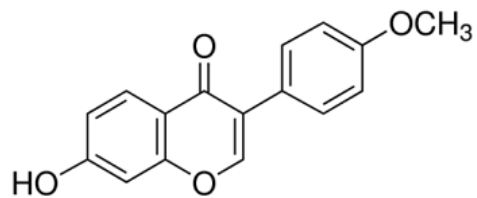

Figure S1. The chemical structure of the natural compounds formononetin and calycosin.

A. The spectra of chiral column analysis of water extracts of *Astragalus membranaceus*.

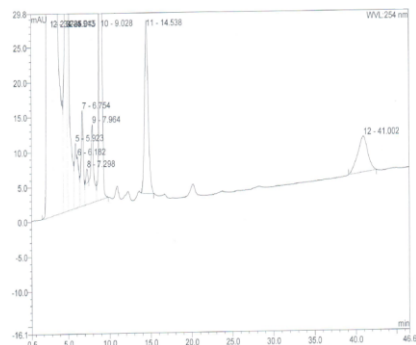

| No.       | Ret.Time (min) | Height (mAU) | Area (mAU*min) | Rel.Area (%) | Type        |
|-----------|----------------|--------------|----------------|--------------|-------------|
| 1         | 2.87           | 460.27       | 174.34         | 34.18        | MB*         |
| 2         | 3.28           | 539.94       | 196.90         | 38.61        | BMB*        |
| 3         | 4.91           | 299.35       | 53.21          | 10.43        | M*          |
| 4         | 5.04           | 310.03       | 42.20          | 8.27         | M*          |
| 5         | 5.92           | 2.73         | 0.58           | 0.11         | BMB*        |
| 6         | 6.75           | 8.02         | 1.54           | 0.30         | BMB*        |
| 7         | 7.96           | 5.57         | 1.06           | 0.21         | BMB*        |
| 8         | 9.03           | 70.61        | 20.40          | 4.00         | BMB*        |
| 9         | 14.54          | 24.76        | 12.46          | 2.44         | BMB*        |
| <b>10</b> | <b>41.00</b>   | <b>5.08</b>  | <b>7.29</b>    | <b>1.43</b>  | <b>BMB*</b> |
| Total     |                | 1726.40      | 510.00         | 100.00       |             |

B. The spectra of chiral column analysis of formononetin.

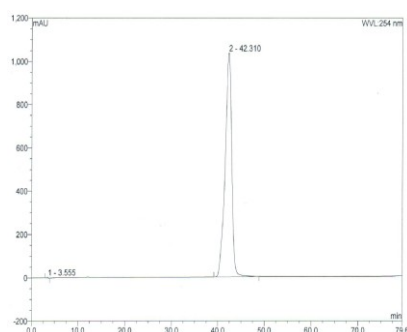

| No.      | Ret.Time (min) | Height (mAU)   | Area (mAU*min) | Rel.Area (%) | Type        |
|----------|----------------|----------------|----------------|--------------|-------------|
| 1        | 3.56           | 4.03           | 1.17           | 0.07         | BMB*        |
| <b>2</b> | <b>42.31</b>   | <b>1034.14</b> | <b>1722.29</b> | <b>99.93</b> | <b>BMB*</b> |
| Total    |                | 1038.17        | 1723.45        | 100.00       |             |

Figure S2. The HPLC analysis of the water extract of *Astragalus membranaceus* (A) and formononetin (B).

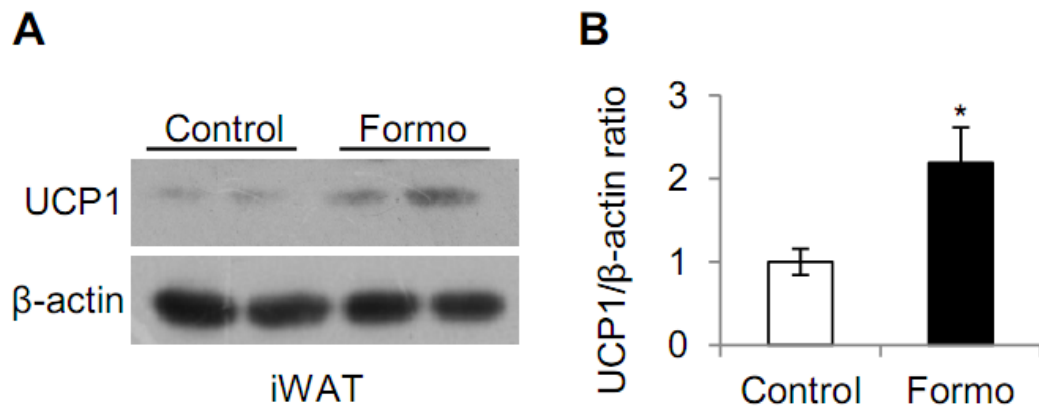

**Figure S3. The UCP1 expression was detected in the inguinal adipose tissues.**

Western blot analysis of UCP1 in the inguinal white adipose tissue (iWAT, A) and densitometric analysis of the relative abundance of UCP1 (B) ( $n = 5$ ),  $\beta$ -actin was adopted as an internal standard to control for unwanted sources of variation, the ratio of UCP-1 expression in BAT was normalized to  $\beta$ -actin (control). Data represent mean  $\pm$  SEM, the experiments had been repeated three times,  $*p < 0.05$ .

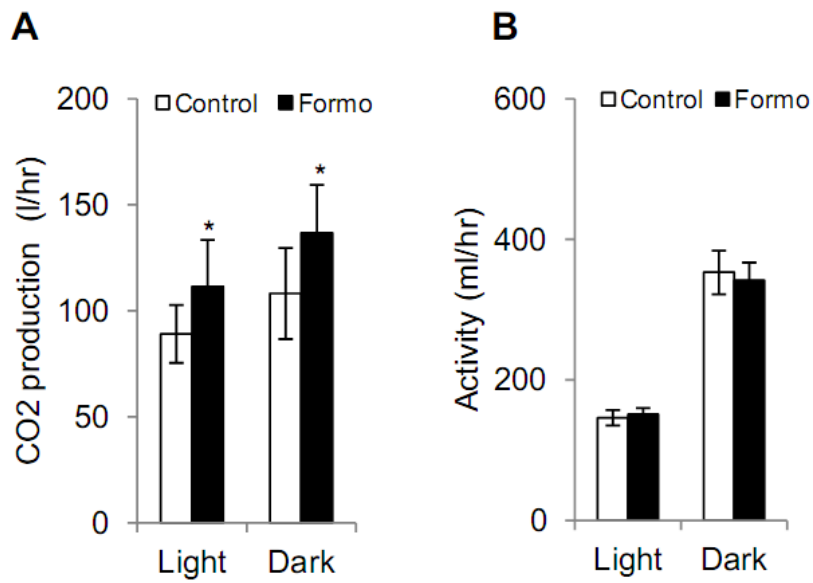

Figure S4: Eight-week-old C57BL/6J male mice were fed a high fat diet for 8 weeks to become obese and then treated with the vehicle or formononetin for 8 weeks, followed by analysis of (A) CO<sub>2</sub> production, (B) activity. (n=5). Data represent mean  $\pm$  SEM, the experiments had been repeated three times, \*p<0.05.

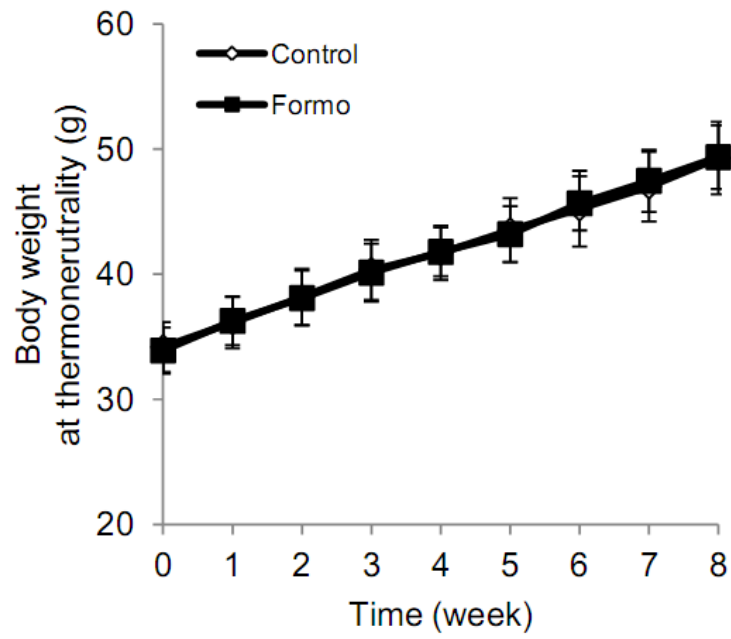

Figure S5: Eight-week-old C57BL/6J male mice were fed a high fat diet for 8 weeks to become obese and then treated with the vehicle (control) or formononetin for 8 weeks at thermoneutrality (n = 6 mice).

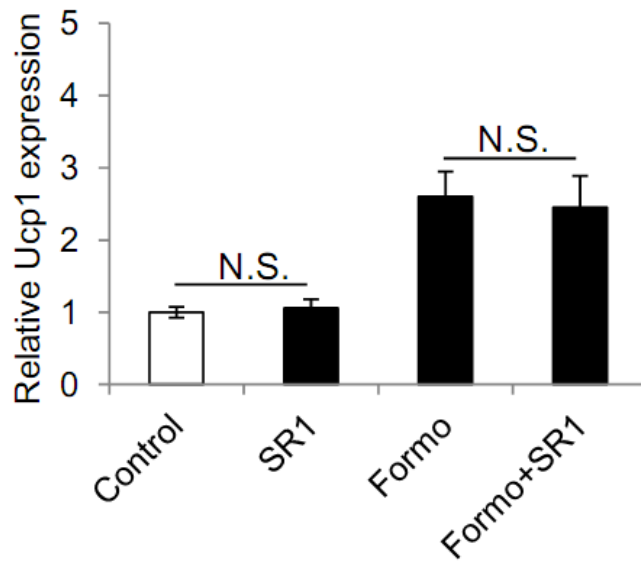

Figure S6: The synergistic effect of AhR inhibitor StemRegenin 1 (SR1) and formononetin on *Ucp1*'s expression (n = 5). For quantitative RT-PCR experiments, 18S ribosomal RNA was adopted as an internal standard to control for unwanted sources of variation. The *ucp1* gene's average mRNA expression was normalized to the blank control (baseline). Data represent mean  $\pm$  SEM, the experiments had been repeated three times, \* $p < 0.05$ .

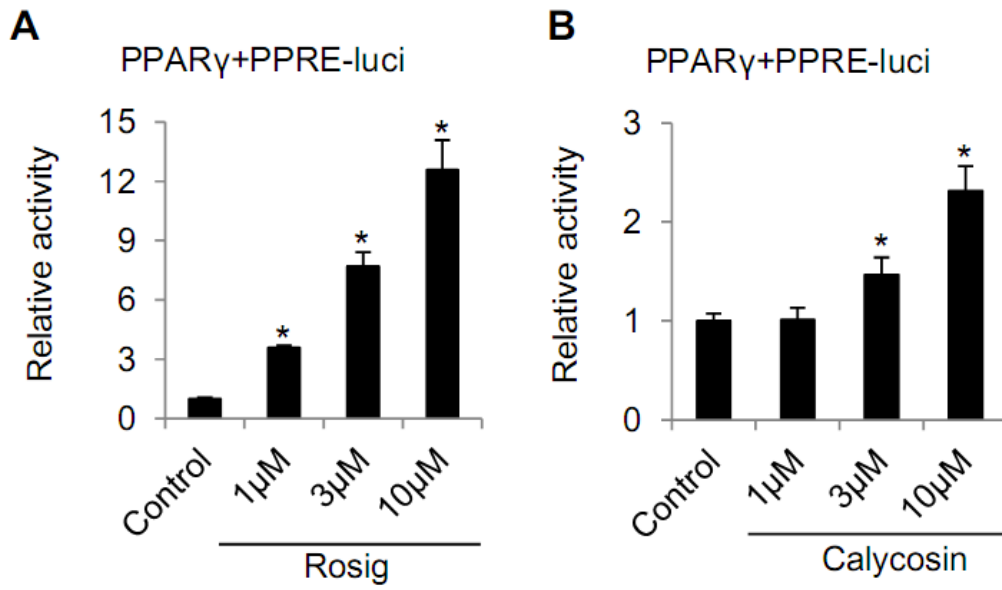

Figure S7: Rosiglitazone (A) and calycosin (B) dose dependently promoted luciferase activity in COS7 cells transfected with PPAR $\gamma$  and PPRE-luciferase plasmids (n = 5). The luciferase activity was normalized to the blank control as baseline. Data represent mean  $\pm$  SEM, the experiments had been repeated three times, \*p<0.05.

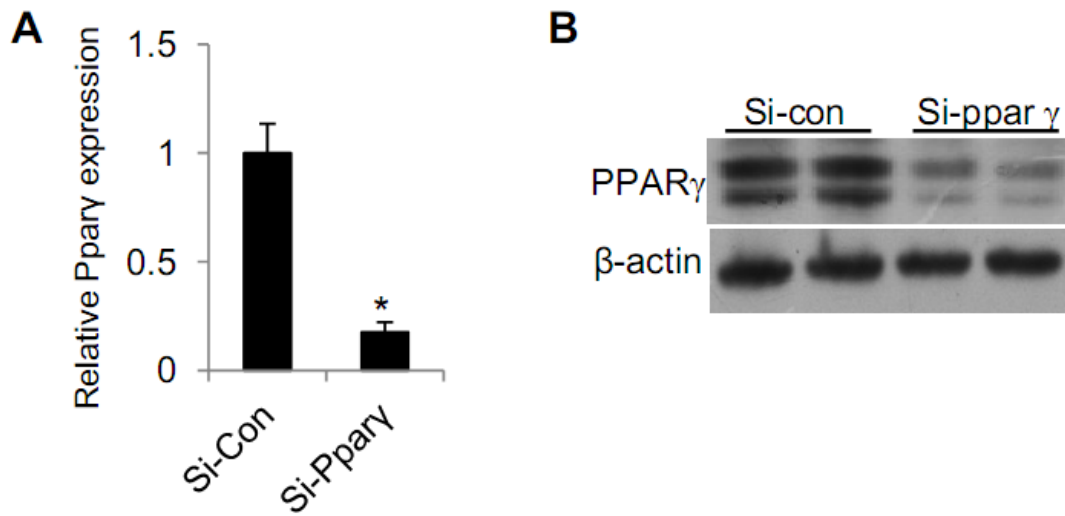

Figure S8: The mRNA (A) and protein (B) expression of *Ppar $\gamma$*  in siRNA knockdown of *Ppar $\gamma$*  in primary inguinal adipocytes (n = 5). For quantitative RT-PCR experiments, 18S ribosomal RNA was adopted as an internal standard to control for unwanted sources of variation. The *Ppar $\gamma$*  gene's average mRNA expression was normalized to the blank control (baseline). Data represent mean  $\pm$  SEM, the experiments had been repeated three times, \*p<0.05.



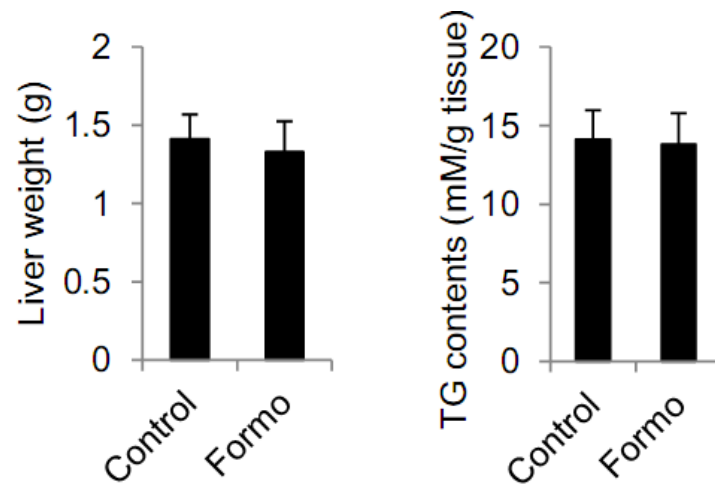

Figure S9. The liver tissue weight (left) and TG contents in liver (right) in control mice and formononetin treated mice (n = 5). Data represent mean  $\pm$  SEM, the experiments had been repeated three times, \* $p < 0.05$ .
